# Supplementary material for: Persistent ER Stress Induces the Spliced Leader RNA Silencing Pathway (SLS), Leading to Programmed Cell Death in Trypanosoma brucei
Source: PubMed Central journal article supplement (PMC2809764; doi:10.1371/journal.ppat.1000731), 2010-01-22
Supplement: ppat.1000731.s003.pdf [file ppat.1000731.s003.pdf]

## S-1

Table S-1: Oligonucleotides

| <b>The following oligonucleotides were used for detection of Northern blots</b> |                                                                       |           |                                                                                                                                                                                                                                             |
|---------------------------------------------------------------------------------|-----------------------------------------------------------------------|-----------|---------------------------------------------------------------------------------------------------------------------------------------------------------------------------------------------------------------------------------------------|
| <b>162920</b>                                                                   | 5'-TCTCCTCACCCCTCGCG                                                  | sense     | complementary to positions 123-141 of tubulin                                                                                                                                                                                               |
| <b>162921</b>                                                                   | 5'-ATGCAGATAGCCTCACGC                                                 | antisense | complementary to positions 3-20 of tubulin                                                                                                                                                                                                  |
| <b>TBNT8.1 Sense</b>                                                            | 5'-CGCAACATGCATGCA<br>TCCTTCTTG                                       | Sense     | Complementary for positions 42-66 of TbNT8.1 -Tb11.02.1100 coding region                                                                                                                                                                    |
| <b>TBNT8.1 anti</b>                                                             | 5'-TCGATGCCTTGATGA<br>TGAC                                            | antisense | Complementary for positions 522-541 of TbNT8.1 -Tb11.02.1100 coding region                                                                                                                                                                  |
| <b>8977</b>                                                                     | 5'-ACTAACGCTATTATTAG<br>AACAGTTTCTGTACTAT                             | Sense     | specific for <i>T. brucei</i> SL RNA 5' from positions 1 to 35                                                                                                                                                                              |
| <b>0244C02</b>                                                                  | 5'- <u>TTAATACGACTCAC</u><br><u>TATAGGGAGAAAAA</u><br>AATAAAAAAAAAATA | Sense     | complementary to positions 143 to 161 with respect to the +1 position of the SL RNA transcript bearing the T7 promoter (underlined)                                                                                                         |
| <b>srRNA-1</b>                                                                  | 5'-TAATGCGCCGAATCACA<br>AC                                            | Antisense | complementary to the small ribosomal RNA -1 from position 177 to 196                                                                                                                                                                        |
| <b>srRNA-2</b>                                                                  | 5'-GGC TTA GAG GCG TTC<br>AGC CGA-3'                                  | Antisense | complementary to the s small ribosomal rRNA-2 from position 134 to 154                                                                                                                                                                      |
| <b>953610</b>                                                                   | 5'- <u>CCGCTCGAGAGCCGGAGC</u><br>TTGCTCTG                             | sense     | Complementary for positions 1-16 of 7SL RNA including <i>XhoI</i> site (underlined)                                                                                                                                                         |
| <b>953611</b>                                                                   | 5'- <u>CCCAAGCTTCCGCCTCGC</u><br>GACGACACT                            | antisense | Complementary for positions 278-253 of 7SL RNA including <i>HindIII</i> site (underlined)                                                                                                                                                   |
| <b>1106</b>                                                                     | 5'-<br>ATACGGGAAGCTATACAGG                                            | sense     | complementary to positions 73-92 of syntaxin Tb10.70.6010                                                                                                                                                                                   |
| <b>1107</b>                                                                     | 5'- TATTACGTCCTGCTGTGC                                                | antisense | complementary to positions 426-444 of syntaxin Tb10.70.6010                                                                                                                                                                                 |
| <b>1098</b>                                                                     | 5'-GCACAAATGATGCTTTAC                                                 | sense     | complementary to positions 136-154 of chaperone protein DnaJ Tb10.389.1150                                                                                                                                                                  |
| <b>1099</b>                                                                     | 5'-CATATTACCCTCCTCACC                                                 | antisense | complementary to positions 417-435 of chaperone protein DnaJ Tb10.389.1150                                                                                                                                                                  |
| <b>1102</b>                                                                     | 5'-<br>GTGGAACAGTTCAGAAAC                                             | sense     | complementary to positions 24-43 of thioredoxin Tb09.160.2020                                                                                                                                                                               |
| <b>1103</b>                                                                     | 5'-AGCTCCAATCACATGT<br>CC                                             | antisense | complementary to positions 251-273 of thioredoxin Tb09.160.2020                                                                                                                                                                             |
| <b>1104</b>                                                                     | 5'-GTTTCATCCTGGAGTTTG                                                 | sense     | complementary to positions 986-1004 of protein disulfide isomerase Tb10.6k15.2290                                                                                                                                                           |
| <b>1105</b>                                                                     | 5'-<br>ACATTAGCTGGTTTCTCAC                                            | antisense | complementary to positions 1378-1397 of protein disulfide isomerase Tb10.6k15.2290                                                                                                                                                          |
| <b>The following oligonucleotides were used for plasmids construction</b>       |                                                                       |           |                                                                                                                                                                                                                                             |
| <b>104</b>                                                                      | 5'-<br>CTAGTCTAGAGTCTGGCAT<br>GTACGGTGACG                             | sense     | from position 399 of the <i>SEC61</i> coding region, including a <i>XbaI</i> site (underlined); was used for PCR amplification of 400 bp for cloning into the pJM326 and pLew100 vectors, respectively, to generate the stem-loop construct |

|             |                                      |           |                                                                                                                                                                                                                                                                                                                                                                    |
|-------------|--------------------------------------|-----------|--------------------------------------------------------------------------------------------------------------------------------------------------------------------------------------------------------------------------------------------------------------------------------------------------------------------------------------------------------------------|
| <b>105</b>  | 5'-CCCAAGCTTCATAAGAG<br>GGACGCGGAAAC | antisense | from positions 798 of the <i>SEC61</i> coding region, including a <i>HindIII</i> site; was used for PCR amplification of 400 bp for cloning into the pJM326 vector to generate the stem-loop construct                                                                                                                                                             |
| <b>106</b>  | 5'-CGACGCGTCATAAGAGG<br>GACGCGGAAAC  | antisense | from positions 798 of the <i>SEC61</i> coding region, including a <i>MluI</i> site; was used for PCR amplification of 400 bp for cloning into the pLew100 vector to generate the stem-loop construct                                                                                                                                                               |
| <b>829</b>  | 5'-CCCAAGCTTCCATGAGT<br>AAAAAAGATAGC | sense     | from positions 1 of the <i>ATG8</i> coding region                                                                                                                                                                                                                                                                                                                  |
| <b>830</b>  | 5'-CCCGCGCCGCTTAGCA<br>TCCAAATGTCG   | antisense | from positions 363 of the <i>ATG8</i> coding region                                                                                                                                                                                                                                                                                                                |
| <b>1111</b> | 5'-CCCCTCGAGCTGAGGA<br>GGCGCGTTTGA   | sense     | from position 502-520 of the <i>SEC63</i> coding region, including a <i>XhoI</i> site (underlined); was used for PCR amplification of 516 bp for cloning into the p2T7TA-177 vector [B. Wickstead, K. Ersfeld and K. Gull, Mol. Biochem. Parasitol. <b>125</b> (2002), pp. 211–216], to generate silencing construct for transfection into BSF 1313-514 cell line. |
| <b>1112</b> | 5'-CCCGGATCCGGAGAA<br>CTTCGATGTCGC   | antisense | from positions 1000-1018 of the <i>SEC63</i> coding region, including a <i>BamHI</i> site; was used for PCR amplification of 516 bp for cloning into the p2T7TA-177 vector to generate silencing construct for transfection into BSF 1313-514 cell line.                                                                                                           |
